# Supplementary material for: Co-processing of bio-oil from de-oiled Jatropha curcas seed cake with refinery gas–oil over sulfided CoMoP/Al2O3 catalyst
Source: Royal Society of Chemistry journal article supplement (doi:10.1039/c6ra20893b), 2016-01-01
Supplement: c6ra20893b1.pdf [file c6ra20893b1.pdf]

## Co-processing of bio-oil from de-oiled jatropha curcas seeds cake with refinery gas-oil over sulphided CoMoP/Al<sub>2</sub>O<sub>3</sub> catalyst

Mukesh Kumar Poddar,<sup>a, b</sup> , Aditya Rai,<sup>a</sup> Mannar Ram Maurya,<sup>b</sup> and Anil Kumar Sinha<sup>a\*</sup>

*\*Corresponding author. E-mail: asinha@iip.res.in, Tel: +91-1352525842.*

*a: CSIR-Indian Institute of Petroleum, Dehradun, India; b: Indian Institute of Technology, Roorkee, India*

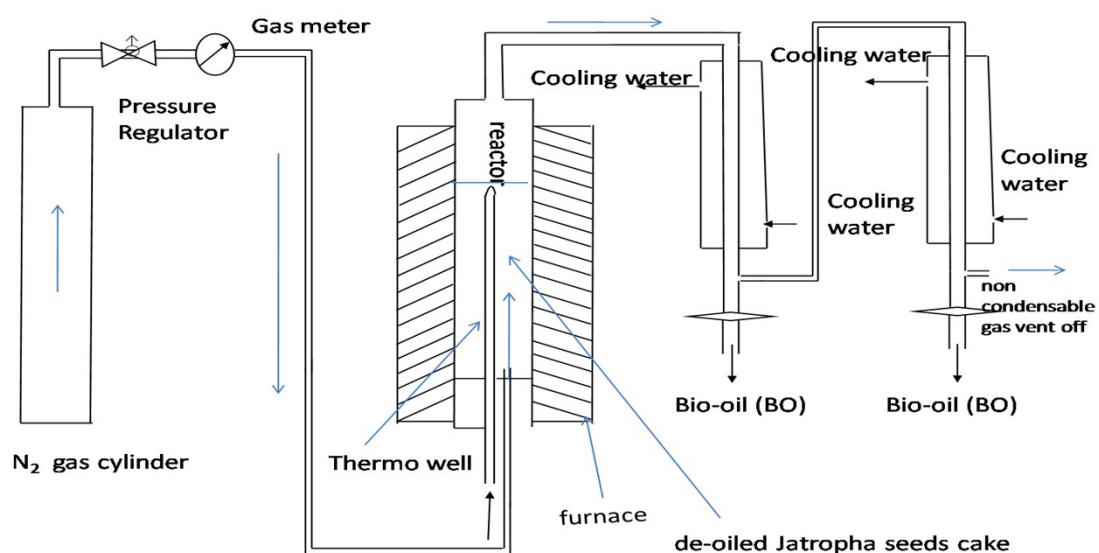

Supporting Fig 1: Schematic representation of experimental set-up for pyrolysis of deoiled jatropha seeds cake.

Supporting Information Table 1: Bio-oil composition determined by GC-MS analysis.

| <b>Bio-oil composition</b> | <b>wt (%)</b> |
|----------------------------|---------------|
| Hydrocarbons               | 48            |
| Aldehydes/Ketones          | 12            |
| Phenols                    | 10            |
| Guaiacols                  | 9             |
| Esters                     | 8             |
| Acids                      | 2             |
| Furans                     | 2             |
| Alcohols                   | 1             |
| Others                     | 8             |
